# Supplementary material for: Antimicrobial Resistance in Chennai's Wastewater Treatment Plants: A Multi-Scale Assessment of Antibiotic-Resistant Bacteria and Genes Dissemination
Source: Research Square preprint supplement (doi:10.21203/rs.3.rs-7505023/v1), 2025-11-11
Supplement: Supplementary file 1 [file 994c586451f0b287f4f93437.docx]

**SUPPLEMENTARY DATA**

**Table S1: Antibiotic discs used for AST**

| **No.** | **Antibiotic Disc Name** | **Abbrev.** | **Antibiotic class** | **Conc (mcg)** |
| --- | --- | --- | --- | --- |
| 1 | Gentamicin | GEN | Aminoglycosides | 10 |
| 2 | Doxycycline Hydrochloride | DOX | Tetracyclines | 30 |
| 3 | Ciprofloxacin | CIP | Fluoroquinolones | 5 |
| 4 | Trimethoprim | TMP | Folate-pathway-antagonists | 5 |
| 5 | Moxifloxacin | MXF | Fluoroquinolones | 5 |
| 6 | Chloramphenicol | CHL | Phenicols | 30 |
| 7 | Tetracycline | TET | Tetracyclines | 30 |
| 8 | Amoxicillin/ Clavulanic acid | AMC | Penicillins | 30 (20/10) |
| 9 | Ampicillin | AMP | Penicillins | 10 |
| 10 | Aztreonam | ATM | Monobactams | 30 |
| 11 | Cefotaxime | CTX | cephalosporins | 5 |
| 12 | Meropenem | MEM | Carbapenems | 10 |
| 13 | Ceftriaxone | CRO | cephalosporins | 30 |
| 14 | Cefixime | CPM | cephalosporins | 5 |

**Table S2: Water Quality Characteristics of Inlet and Outlet Samples from Five WWTPs**

| **Sampling Locations** | **Sample Type** | **pH** | **TDS (ppm)** | **DO (mg/L)** | **Salinity (ppt)** | **ORP (mV)** | **Conductivity (µS/cm)** | **Turbidity (NTU)** | **Nitrate (mg/L)** | **Ammonium (mg/L)** | **Resistivity (Ω-cm)** | **BOD**  **(ppm)** | **COD (ppm)** | **TOC filtered (ppm)** | **TP (ppm)** |
| --- | --- | --- | --- | --- | --- | --- | --- | --- | --- | --- | --- | --- | --- | --- | --- |
| **WWTP A** | ***A_inlet*** | 7.25 | 1739.00 | 1.04 | 0.74 | -228.20 | 1482.00 | 297.00 | 31.80 | 120.00 | 641.00 | 368.1 | 672.00 | 187.81 | 52.92 |
| ***A_outlet*** | 7.69 | 721.00 | 4.90 | 0.72 | 162.80 | 1448.00 | 4.86 | 33.40 | 22.70 | 691.00 | 32.7 | 298.00 | 39.35 | 1.95 |
| **WWTP B** | ***B_inlet*** | 7.23 | 1950.00 | 0.89 | 0.96 | -242.70 | 1890.00 | 242.00 | 19.50 | 198.00 | 529.00 | 381.4 | 456.00 | 153.58 | 42.4 |
| ***B_outlet*** | 7.63 | 1654.00 | 4.40 | 1.68 | 86.00 | 3220.00 | 10.90 | 35.00 | 191.80 | 311.00 | 35.5 | 335.00 | 34.76 | 1.86 |
| **WWTP C** | ***C_inlet*** | 6.71 | 1213.00 | 0.53 | 1.23 | -36.30 | 2390.00 | 618.00 | 13.30 | 110.00 | 418.00 | 263.0 | 624.00 | 138.00 | 9.91 |
| ***C_outlet*** | 7.38 | 940.00 | 5.23 | 2.14 | 168.60 | 2050.00 | 35.67 | 10.20 | 94.00 | 247.00 | 28 | 254.00 | 28.80 | 2.78 |
| **WWTP D** | ***D_inlet*** | 6.13 | 566.00 | 0.99 | 0.57 | -36.90 | 1145.00 | 37.57 | 29.30 | 209.00 | 874.00 | 125 | 815.00 | 221.70 | 12.54 |
| ***D_outlet*** | 6.94 | 997.00 | 5.74 | 1.02 | 319.90 | 1997.00 | 82.20 | 17.20 | 111.00 | 523.00 | 36.3 | 386.00 | 34.10 | 3.64 |
| **WWTP E** | ***E_inlet*** | 7.21 | 1560.00 | 1.76 | 0.73 | -214.00 | 1532.00 | 198.00 | 25.30 | 42.00 | 671.00 | 362 | 901.00 | 160.48 | 42.50 |
| ***E_outlet*** | 7.67 | 753.00 | 4.30 | 0.71 | 97.00 | 1440.00 | 5.89 | 15.60 | 11.00 | 389.00 | 46 | 376.00 | 33.10 | 1.89 |

**Table S3. Assessment of Water Quality Parameters and Removal Efficiency Across the Effluent Treatment Plants.**

| **Removal Efficiency (%)** | **WWTP A** | **WWTP B** | **WWTP C** | **WWTP D** | **WWTP E** |
| --- | --- | --- | --- | --- | --- |
| **TDS (ppm)** | 58.54 | 15.18 | 22.51 | -76.15 | 51.73 |
| **Salinity (ppt)** | 2.70 | -75.00 | -73.98 | -78.95 | 2.74 |
| **ORP/Redox (mV)** | 171.34 | 135.43 | 564.46 | 966.94 | 145.33 |
| **Conductivity (µS/cm)** | 2.29 | -70.37 | 14.22 | -74.41 | 6.01 |
| **Turbidity (NTU)** | 98.36 | 95.50 | 94.23 | -118.81 | 97.02 |
| **Ammonium (mg/L)** | 81.08 | 3.13 | 14.54 | 46.89 | 73.81 |
| **Resistivity (Ω-cm)** | -7.80 | 41.21 | 40.91 | 40.16 | 42.02 |
| **BOD (ppm)** | 91.11 | 90.69 | 89.65 | 70.96 | 87 |
| **COD (ppm)** | 55.65 | 26.53 | 59.24 | 52.64 | 58.27 |
| **TOC (ppm)** | 79.05 | 77.37 | 79.24 | 84.62 | 79.37 |

**Table S4: Bacterial Counts (CFU/mL) for Different Agar Media with and without Antibiotics (Mean ± Standard Deviation)**

| **Sampling Locations** | **Sample ID** | **TBX B 44**  **(Log CFU/ml)** | **OSS 44**  **(Log CFU/ml)** | **OSS 30**  **(Log CFU/ml)** | **CARB 44**  **(Log CFU/ml)** | **CARB 30**  **(Log CFU/ml)** | **ESBL 44**  **(Log CFU/ml)** | **ESBL 30**  **(Log CFU/ml)** |
| --- | --- | --- | --- | --- | --- | --- | --- | --- |
| **WWTP A** | A_inlet | 4.858 ± 0.011 | 0.343 ± 0.011 | 4.598 ± 0.020 | 4.582 ± 0.021 | 4.575 ± 0.021 | 2.687 ± 0.000 | 4.605 ± 0.020 |
| A_outlet | 0.343 ± 0.011 | 0.343 ± 0.011 | 0.343 ± 0.000 | 0.343 ± 0.011 | 0.343 ± 0.000 | 0.343 ± 0.000 | 0.343 ± 0.000 |
| **WWTP B** | B_inlet | 4.564 ± 0.011 | 2.316 ± 0.082 | 4.604 ± 0.021 | 0.343 ± 0.011 | 4.211 ± 0.031 | 3.125 ± 0.034 | 4.651 ± 0.001 |
| B_outlet | 0.343 ± 0.011 | 0.343 ± 0.011 | 2.839 ± 0.049 | 0.343 ± 0.011 | 0.343 ± 0.000 | 0.343 ± 0.011 | 3.140 ± 0.034 |
| **WWTP C** | C_inlet | 2.790 ± 0.011 | 0.343 ± 0.011 | 2.863 ± 0.033 | 0.343 ± 0.011 | 1.131 ± 0.198 | 0.343 ± 0.011 | 1.256 ± 0.176 |
| C_outlet | 0.955 ± 0.011 | 0.343 ± 0.011 | 1.499 ± 0.139 | 0.343 ± 0.011 | 0.654 ± 0.301 | 0.343 ± 0.011 | 0.654 ± 0.301 |
| **WWTP D** | D_inlet | 4.138 ± 0.011 | 0.343 ± 0.011 | 4.882 ± 0.010 | 0.343 ± 0.011 | 4.406 ± 0.018 | 0.343 ± 0.011 | 4.902 ± 0.010 |
| D_outlet | 2.540 ± 0.011 | 0.343 ± 0.011 | 1.955 ± 0.088 | 0.343 ± 0.011 | 0.654 ± 0.301 | 0.343 ± 0.011 | 1.131 ± 0.198 |
| **WWTP E** | E_inlet | 0.343 ± 0.011 | 0.343 ± 0.011 | 4.917 ± 0.010 | 0.343 ± 0.011 | 4.842 ± 0.011 | 0.343 ± 0.011 | 4.487 ± 0.022 |
| E_outlet | 0.343 ± 0.011 | 0.343 ± 0.011 | 2.517 ± 0.048 | 0.343 ± 0.011 | 2.695 ± 0.040 | 0.343 ± 0.011 | 2.803 ± 0.035 |

**Table S5: AST profiles of the E. coli isolates from various Sampling Locations**

| No | **WWTP Name** | **Sample Type** | **Isolate Number** | **GEN** | **DOX** | **TET** | **CIP** | **MXF** | **TMP** | **CHL** | **AMC** | **AMP** | **ATM** | **CTX** | **CRO** | **CPM** | **MEM** |
| --- | --- | --- | --- | --- | --- | --- | --- | --- | --- | --- | --- | --- | --- | --- | --- | --- | --- |
| 1 | WWTP A | inlet | 31 | S | R | S | S | S | R | S | R | R | S | S | R | S | S |
| 2 | WWTP A | inlet | 32 | S | R | R | R | R | R | S | R | R | R | S | S | S | S |
| 3 | WWTP A | inlet | 33 | S | R | R | R | R | R | S | R | S | S | S | S | S | S |
| 4 | WWTP A | inlet | 34 | S | R | R | R | R | R | S | R | R | R | R | R | S | S |
| 5 | WWTP A | inlet | 35 | S | R | R | R | R | R | S | S | R | R | R | S | S | S |
| 6 | WWTP A | inlet | 36 | S | R | R | S | R | R | R | R | R | S | S | S | S | S |
| 7 | WWTP A | inlet | 37 | S | R | S | S | R | R | S | R | R | R | S | S | S | S |
| 8 | WWTP A | inlet | 38 | S | R | S | S | R | R | R | R | S | S | S | R | S | S |
| 9 | WWTP A | inlet | 39 | S | R | S | S | R | R | R | S | S | R | S | S | S | S |
| 10 | WWTP A | inlet | 40 | R | S | R | S | R | S | S | R | R | R | R | R | R | S |
| 11 | WWTP A | inlet | 41 | S | S | R | S | R | S | S | R | R | R | R | R | R | S |
| 12 | WWTP A | inlet | 42 | R | S | S | S | R | R | S | R | R | S | R | S | R | S |
| 13 | WWTP A | inlet | 43 | R | R | R | S | R | R | S | R | R | S | S | R | R | S |
| 14 | WWTP A | inlet | 44 | S | R | R | S | S | R | S | R | R | S | S | S | S | S |
| 15 | WWTP B | inlet | 1 | S | R | R | S | S | R | S | R | S | S | R | S | S | S |
| 16 | WWTP B | inlet | 2 | S | S | S | S | R | S | S | S | R | S | S | S | S | S |
| 17 | WWTP B | inlet | 3 | S | R | R | S | S | R | R | R | S | S | S | R | S | S |
| 18 | WWTP B | inlet | 4 | S | S | S | S | S | S | S | S | R | S | S | R | R | S |
| 19 | WWTP B | inlet | 5 | S | S | R | S | R | R | S | S | R | S | S | S | S | S |
| 20 | WWTP B | inlet | 6 | S | S | S | R | S | R | S | S | R | S | S | S | S | S |
| 21 | WWTP B | inlet | 7 | S | S | S | S | S | R | S | R | R | S | R | S | S | S |
| 22 | WWTP B | inlet | 8 | S | S | R | R | S | S | S | S | S | S | R | R | R | S |
| 23 | WWTP B | inlet | 9 | S | S | S | R | S | S | S | S | S | R | S | S | S | S |
| 24 | WWTP B | inlet | 10 | S | R | S | S | S | S | S | S | R | S | S | S | S | S |
| 25 | WWTP B | inlet | 11 | S | S | S | R | R | S | S | S | S | S | S | S | S | S |
| 26 | WWTP B | inlet | 12 | S | S | S | S | R | S | S | S | R | S | R | S | S | S |
| 27 | WWTP B | inlet | 13 | S | R | R | R | R | R | S | S | R | S | S | S | S | S |
| 28 | WWTP B | inlet | 14 | S | S | R | S | S | R | S | S | S | S | R | R | R | S |
| 29 | WWTP B | inlet | 15 | S | S | S | R | R | S | S | R | R | S | R | S | S | S |
| 30 | WWTP B | inlet | 16 | S | S | S | S | S | S | S | S | S | S | R | R | S | S |
| 31 | WWTP B | inlet | 17 | S | S | S | S | S | S | S | R | R | S | S | S | S | S |
| 32 | WWTP B | inlet | 18 | S | S | S | S | R | S | S | S | R | S | S | S | S | S |
| 33 | WWTP B | inlet | 19 | S | R | S | S | S | S | S | R | R | S | R | S | S | S |
| 34 | WWTP B | inlet | 20 | S | R | S | S | S | R | S | R | R | S | S | S | S | S |
| 35 | WWTP B | inlet | 21 | S | S | S | S | S | S | S | S | R | R | R | R | R | S |
| 36 | WWTP B | inlet | 22 | S | S | S | S | S | S | S | S | R | R | R | R | R | S |
| 37 | WWTP B | inlet | 23 | S | S | S | S | S | R | S | R | R | R | R | R | R | S |
| 38 | WWTP B | inlet | 24 | S | S | S | S | S | S | S | S | R | R | R | R | R | S |
| 39 | WWTP B | inlet | 25 | S | S | S | R | R | S | S | S | S | S | S | S | S | S |
| 40 | WWTP B | inlet | 26 | S | S | S | S | S | S | S | S | R | R | R | R | R | S |
| 41 | WWTP B | inlet | 27 | S | S | R | S | S | S | S | R | R | R | R | R | R | S |
| 42 | WWTP B | inlet | 28 | S | S | S | S | S | S | S | R | R | R | R | R | R | S |
| 43 | WWTP B | inlet | 29 | S | S | S | S | S | S | S | S | R | R | R | R | R | S |
| 44 | WWTP B | inlet | 30 | S | S | S | S | S | S | S | S | R | S | R | R | R | S |
| 45 | WWTP C | inlet | 94 | S | S | S | S | S | S | S | S | R | S | R | R | R | S |
| 46 | WWTP C | inlet | 95 | S | S | S | S | S | S | R | R | S | R | S | S | R | S |
| 47 | WWTP C | inlet | 96 | S | S | S | S | R | S | S | S | S | S | R | R | S | S |
| 48 | WWTP C | inlet | 97 | S | S | S | S | S | S | S | S | R | S | R | R | R | S |
| 49 | WWTP D | inlet | 45 | S | S | S | R | R | R | R | R | R | R | R | R | R | S |
| 50 | WWTP D | inlet | 46 | S | S | S | R | R | R | S | R | R | S | S | S | S | S |
| 51 | WWTP D | inlet | 47 | S | R | S | R | R | S | S | S | S | S | S | S | S | S |
| 52 | WWTP D | inlet | 48 | R | S | R | R | R | R | S | R | R | R | R | S | S | S |
| 53 | WWTP D | inlet | 49 | S | R | S | R | R | R | S | R | R | R | R | R | S | S |
| 54 | WWTP D | inlet | 50 | S | R | S | R | R | R | S | R | R | R | S | S | S | S |
| 55 | WWTP D | inlet | 51 | S | R | R | R | R | R | R | R | R | S | R | R | S | S |
| 56 | WWTP D | inlet | 52 | S | S | S | R | R | R | S | R | R | S | S | S | S | S |
| 57 | WWTP D | inlet | 53 | S | S | R | R | R | R | R | R | R | S | S | S | S | S |
| 58 | WWTP D | inlet | 54 | S | R | R | R | R | R | R | R | R | S | S | S | S | S |
| 59 | WWTP D | inlet | 55 | R | S | R | R | R | R | R | R | R | R | R | R | R | S |
| 60 | WWTP D | inlet | 56 | S | S | S | R | R | R | S | R | R | S | S | S | S | S |
| 61 | WWTP D | inlet | 57 | S | S | R | R | R | R | R | R | R | S | R | R | R | S |
| 62 | WWTP D | inlet | 58 | R | S | R | R | R | R | S | R | R | S | S | S | S | S |
| 63 | WWTP D | inlet | 59 | R | S | R | R | R | R | S | R | R | R | S | S | S | S |
| 64 | WWTP D | inlet | 60 | S | S | R | R | R | R | R | R | R | S | S | S | S | S |
| 65 | WWTP D | inlet | 61 | S | R | R | R | R | R | R | R | R | R | R | R | S | S |
| 66 | WWTP D | inlet | 62 | R | R | R | S | R | R | R | R | R | S | S | S | S | S |
| 67 | WWTP D | inlet | 63 | S | R | R | R | R | R | S | R | R | S | R | S | S | S |
| 68 | WWTP D | inlet | 64 | S | R | S | S | R | S | S | S | R | S | S | S | S | S |
| 69 | WWTP D | inlet | 65 | S | S | S | R | R | S | S | S | S | S | S | S | S | S |
| 70 | WWTP D | inlet | 66 | S | S | S | R | R | R | S | R | R | R | R | R | R | S |
| 71 | WWTP D | inlet | 67 | S | S | S | R | R | S | S | R | R | S | S | S | R | S |
| 72 | WWTP D | inlet | 68 | S | S | S | R | R | R | S | S | R | S | S | S | S | S |
| 73 | WWTP D | inlet | 69 | S | R | R | S | R | S | S | R | R | S | S | S | S | S |
| 74 | WWTP D | inlet | 70 | S | S | S | R | R | R | S | R | R | R | R | R | R | S |
| 75 | WWTP D | inlet | 71 | S | S | S | S | R | R | S | R | R | S | S | S | R | S |
| 76 | WWTP D | inlet | 72 | S | R | R | R | R | R | S | R | R | S | S | S | R | S |
| 77 | WWTP D | inlet | 73 | S | S | S | S | S | S | S | S | R | R | R | R | R | S |
| 78 | WWTP D | Outlet | 74 | S | R | R | R | R | R | R | R | R | R | R | R | S | S |
| 79 | WWTP D | Outlet | 75 | S | S | S | S | R | R | R | R | R | S | R | S | S | S |
| 80 | WWTP D | Outlet | 76 | R | S | R | R | R | R | S | R | R | R | R | R | R | S |
| 81 | WWTP D | Outlet | 77 | S | R | S | R | R | R | R | R | R | S | R | R | R | S |
| 82 | WWTP D | Outlet | 78 | S | R | S | S | R | R | R | S | R | R | R | S | R | S |
| 83 | WWTP D | Outlet | 79 | S | S | S | R | R | R | S | R | R | S | S | S | R | S |
| 84 | WWTP D | Outlet | 80 | S | R | R | R | R | R | R | R | R | R | R | S | R | R |
| 85 | WWTP D | Outlet | 81 | S | S | S | R | R | R | S | R | R | S | R | R | S | S |
| 86 | WWTP D | Outlet | 82 | S | S | S | S | R | R | S | R | R | S | R | R | S | S |
| 87 | WWTP D | Outlet | 83 | S | S | S | R | R | R | S | R | R | S | R | S | S | S |
| 88 | WWTP D | Outlet | 84 | S | S | R | R | R | R | R | R | R | S | R | R | R | S |
| 89 | WWTP D | Outlet | 85 | S | R | R | R | R | R | R | R | R | R | R | R | R | S |
| 90 | WWTP D | Outlet | 86 | S | S | S | R | R | R | S | S | R | S | R | R | S | S |
| 91 | WWTP D | Outlet | 87 | S | S | S | S | S | R | S | S | R | R | R | R | R | S |
| 92 | WWTP D | Outlet | 88 | S | S | S | S | S | S | S | R | R | R | R | R | R | S |
| 93 | WWTP D | Outlet | 89 | S | S | S | S | S | R | R | S | R | R | R | R | R | S |
| 94 | WWTP D | Outlet | 90 | S | S | S | S | S | S | S | S | R | R | R | R | R | S |
| 95 | WWTP D | Outlet | 91 | R | R | R | R | R | R | S | R | R | S | S | S | R | S |
| 96 | WWTP D | Outlet | 92 | S | S | S | S | S | S | S | S | R | R | R | R | R | S |
| 97 | WWTP D | Outlet | 93 | S | R | R | R | R | R | S | R | R | S | S | S | R | S |

**Table S6: Biochemical Characterisation of the Bacterial Isolates**

| **WWTP Name** | **Sample Type** | **Isolate Number** | **Gram Staining** | **Motility** | **Indole** | **TSI** | **Citrate** | **Methyl Red test** | **Catalase Test** | **Oxidase** | **Urease** | **VP test** | **H2S** |
| --- | --- | --- | --- | --- | --- | --- | --- | --- | --- | --- | --- | --- | --- |
| **WWTP A** | **inlet** | **31** | **N** | **P** | **P** | **P** | **N** | **P** | **P** | **N** | **N** | **N** | **N** |
| **WWTP A** | **inlet** | **32** | **N** | **P** | **P** | **P** | **N** | **P** | **P** | **N** | **N** | **N** | **N** |
| **WWTP A** | **inlet** | **33** | **N** | **P** | **P** | **P** | **N** | **P** | **P** | **N** | **N** | **N** | **N** |
| **WWTP A** | **inlet** | **34** | **N** | **P** | **P** | **P** | **N** | **P** | **P** | **N** | **N** | **N** | **N** |
| **WWTP A** | **inlet** | **35** | **N** | **P** | **P** | **P** | **N** | **P** | **P** | **N** | **N** | **N** | **N** |
| **WWTP A** | **inlet** | **36** | **N** | **P** | **P** | **P** | **N** | **P** | **P** | **N** | **N** | **N** | **N** |
| **WWTP A** | **inlet** | **37** | **N** | **P** | **P** | **P** | **N** | **P** | **P** | **N** | **N** | **N** | **N** |
| **WWTP A** | **inlet** | **38** | **N** | **P** | **P** | **P** | **N** | **P** | **P** | **N** | **N** | **N** | **N** |
| **WWTP A** | **inlet** | **39** | **N** | **P** | **P** | **P** | **N** | **P** | **P** | **N** | **N** | **N** | **N** |
| **WWTP A** | **inlet** | **40** | **N** | **P** | **P** | **P** | **N** | **P** | **P** | **N** | **N** | **N** | **N** |
| **WWTP A** | **inlet** | **41** | **N** | **P** | **P** | **P** | **N** | **P** | **P** | **N** | **N** | **N** | **N** |
| **WWTP A** | **inlet** | **42** | **N** | **P** | **P** | **P** | **N** | **P** | **P** | **N** | **N** | **N** | **N** |
| **WWTP A** | **inlet** | **43** | **N** | **P** | **P** | **P** | **N** | **P** | **P** | **N** | **N** | **N** | **N** |
| **WWTP A** | **inlet** | **44** | **N** | **P** | **P** | **P** | **N** | **P** | **P** | **N** | **N** | **N** | **N** |
| **WWTP B** | **inlet** | **1** | **N** | **P** | **P** | **P** | **N** | **P** | **P** | **N** | **N** | **N** | **N** |
| **WWTP B** | **inlet** | **2** | **N** | **P** | **P** | **P** | **N** | **P** | **P** | **N** | **N** | **N** | **N** |
| **WWTP B** | **inlet** | **3** | **N** | **P** | **P** | **P** | **N** | **P** | **P** | **N** | **N** | **N** | **N** |
| **WWTP B** | **inlet** | **4** | **N** | **P** | **P** | **P** | **N** | **P** | **P** | **N** | **N** | **N** | **N** |
| **WWTP B** | **inlet** | **5** | **N** | **P** | **P** | **P** | **N** | **P** | **P** | **N** | **N** | **N** | **N** |
| **WWTP B** | **inlet** | **6** | **N** | **P** | **P** | **P** | **N** | **P** | **P** | **N** | **N** | **N** | **N** |
| **WWTP B** | **inlet** | **7** | **N** | **P** | **P** | **P** | **N** | **P** | **P** | **N** | **N** | **N** | **N** |
| **WWTP B** | **inlet** | **8** | **N** | **P** | **P** | **P** | **N** | **P** | **P** | **N** | **N** | **N** | **N** |
| **WWTP B** | **inlet** | **9** | **N** | **P** | **P** | **P** | **N** | **P** | **P** | **N** | **N** | **N** | **N** |
| **WWTP B** | **inlet** | **10** | **N** | **P** | **P** | **P** | **N** | **P** | **P** | **N** | **N** | **N** | **N** |
| **WWTP B** | **inlet** | **11** | **N** | **P** | **P** | **P** | **N** | **P** | **P** | **N** | **N** | **N** | **N** |
| **WWTP B** | **inlet** | **12** | **N** | **P** | **P** | **P** | **N** | **P** | **P** | **N** | **N** | **N** | **N** |
| **WWTP B** | **inlet** | **13** | **N** | **P** | **P** | **P** | **N** | **P** | **P** | **N** | **N** | **N** | **N** |
| **WWTP B** | **inlet** | **14** | **N** | **P** | **P** | **P** | **N** | **P** | **P** | **N** | **N** | **N** | **N** |
| **WWTP B** | **inlet** | **15** | **N** | **P** | **P** | **P** | **N** | **P** | **P** | **N** | **N** | **N** | **N** |
| **WWTP B** | **inlet** | **16** | **N** | **P** | **P** | **P** | **N** | **P** | **P** | **N** | **N** | **N** | **N** |
| **WWTP B** | **inlet** | **17** | **N** | **P** | **P** | **P** | **N** | **P** | **P** | **N** | **N** | **N** | **N** |
| **WWTP B** | **inlet** | **18** | **N** | **P** | **P** | **P** | **N** | **P** | **P** | **N** | **N** | **N** | **N** |
| **WWTP B** | **inlet** | **19** | **N** | **P** | **P** | **P** | **N** | **P** | **P** | **N** | **N** | **N** | **N** |
| **WWTP B** | **inlet** | **20** | **N** | **P** | **P** | **P** | **N** | **P** | **P** | **N** | **N** | **N** | **N** |
| **WWTP B** | **inlet** | **21** | **N** | **P** | **P** | **P** | **N** | **P** | **P** | **N** | **N** | **N** | **N** |
| **WWTP B** | **inlet** | **22** | **N** | **P** | **P** | **P** | **N** | **P** | **P** | **N** | **N** | **N** | **N** |
| **WWTP B** | **inlet** | **23** | **N** | **P** | **P** | **P** | **N** | **P** | **P** | **N** | **N** | **N** | **N** |
| **WWTP B** | **inlet** | **24** | **N** | **P** | **P** | **P** | **N** | **P** | **P** | **N** | **N** | **N** | **N** |
| **WWTP B** | **inlet** | **25** | **N** | **P** | **P** | **P** | **N** | **P** | **P** | **N** | **N** | **N** | **N** |
| **WWTP B** | **inlet** | **26** | **N** | **P** | **P** | **P** | **N** | **P** | **P** | **N** | **N** | **N** | **N** |
| **WWTP B** | **inlet** | **27** | **N** | **P** | **P** | **P** | **N** | **P** | **P** | **N** | **N** | **N** | **N** |
| **WWTP B** | **inlet** | **28** | **N** | **P** | **P** | **P** | **N** | **P** | **P** | **N** | **N** | **N** | **N** |
| **WWTP B** | **inlet** | **29** | **N** | **P** | **P** | **P** | **N** | **P** | **P** | **N** | **N** | **N** | **N** |
| **WWTP B** | **inlet** | **30** | **N** | **P** | **P** | **P** | **N** | **P** | **P** | **N** | **N** | **N** | **N** |
| **WWTP C** | **inlet** | **94** | **N** | **P** | **P** | **P** | **N** | **P** | **P** | **N** | **N** | **N** | **N** |
| **WWTP C** | **inlet** | **95** | **N** | **P** | **P** | **P** | **N** | **P** | **P** | **N** | **N** | **N** | **N** |
| **WWTP C** | **inlet** | **96** | **N** | **P** | **P** | **P** | **N** | **P** | **P** | **N** | **N** | **N** | **N** |
| **WWTP C** | **inlet** | **97** | **N** | **P** | **P** | **P** | **N** | **P** | **P** | **N** | **N** | **N** | **N** |
| **WWTP D** | **inlet** | **45** | **N** | **P** | **P** | **P** | **N** | **P** | **P** | **N** | **N** | **N** | **N** |
| **WWTP D** | **inlet** | **46** | **N** | **P** | **P** | **P** | **N** | **P** | **P** | **N** | **N** | **N** | **N** |
| **WWTP D** | **inlet** | **47** | **N** | **P** | **P** | **P** | **N** | **P** | **P** | **N** | **N** | **N** | **N** |
| **WWTP D** | **inlet** | **48** | **N** | **P** | **P** | **P** | **N** | **P** | **P** | **N** | **N** | **N** | **N** |
| **WWTP D** | **inlet** | **49** | **N** | **P** | **P** | **P** | **N** | **P** | **P** | **N** | **N** | **N** | **N** |
| **WWTP D** | **inlet** | **50** | **N** | **P** | **P** | **P** | **N** | **P** | **P** | **N** | **N** | **N** | **N** |
| **WWTP D** | **inlet** | **51** | **N** | **P** | **P** | **P** | **N** | **P** | **P** | **N** | **N** | **N** | **N** |
| **WWTP D** | **inlet** | **52** | **N** | **P** | **P** | **P** | **N** | **P** | **P** | **N** | **N** | **N** | **N** |
| **WWTP D** | **inlet** | **53** | **N** | **P** | **P** | **P** | **N** | **P** | **P** | **N** | **N** | **N** | **N** |
| **WWTP D** | **inlet** | **54** | **N** | **P** | **P** | **P** | **N** | **P** | **P** | **N** | **N** | **N** | **N** |
| **WWTP D** | **inlet** | **55** | **N** | **P** | **P** | **P** | **N** | **P** | **P** | **N** | **N** | **N** | **N** |
| **WWTP D** | **inlet** | **56** | **N** | **P** | **P** | **P** | **N** | **P** | **P** | **N** | **N** | **N** | **N** |
| **WWTP D** | **inlet** | **57** | **N** | **P** | **P** | **P** | **N** | **P** | **P** | **N** | **N** | **N** | **N** |
| **WWTP D** | **inlet** | **58** | **N** | **P** | **P** | **P** | **N** | **P** | **P** | **N** | **N** | **N** | **N** |
| **WWTP D** | **inlet** | **59** | **N** | **P** | **P** | **P** | **N** | **P** | **P** | **N** | **N** | **N** | **N** |
| **WWTP D** | **inlet** | **60** | **N** | **P** | **P** | **P** | **N** | **P** | **P** | **N** | **N** | **N** | **N** |
| **WWTP D** | **inlet** | **61** | **N** | **P** | **P** | **P** | **N** | **P** | **P** | **N** | **N** | **N** | **N** |
| **WWTP D** | **inlet** | **62** | **N** | **P** | **P** | **P** | **N** | **P** | **P** | **N** | **N** | **N** | **N** |
| **WWTP D** | **inlet** | **63** | **N** | **P** | **P** | **P** | **N** | **P** | **P** | **N** | **N** | **N** | **N** |
| **WWTP D** | **inlet** | **64** | **N** | **P** | **P** | **P** | **N** | **P** | **P** | **N** | **N** | **N** | **N** |
| **WWTP D** | **inlet** | **65** | **N** | **P** | **P** | **P** | **N** | **P** | **P** | **N** | **N** | **N** | **N** |
| **WWTP D** | **inlet** | **66** | **N** | **P** | **P** | **P** | **N** | **P** | **P** | **N** | **N** | **N** | **N** |
| **WWTP D** | **inlet** | **67** | **N** | **P** | **P** | **P** | **N** | **P** | **P** | **N** | **N** | **N** | **N** |
| **WWTP D** | **inlet** | **68** | **N** | **P** | **P** | **P** | **N** | **P** | **P** | **N** | **N** | **N** | **N** |
| **WWTP D** | **inlet** | **69** | **N** | **P** | **P** | **P** | **N** | **P** | **P** | **N** | **N** | **N** | **N** |
| **WWTP D** | **inlet** | **70** | **N** | **P** | **P** | **P** | **N** | **P** | **P** | **N** | **N** | **N** | **N** |
| **WWTP D** | **inlet** | **71** | **N** | **P** | **P** | **P** | **N** | **P** | **P** | **N** | **N** | **N** | **N** |
| **WWTP D** | **inlet** | **72** | **N** | **P** | **P** | **P** | **N** | **P** | **P** | **N** | **N** | **N** | **N** |
| **WWTP D** | **inlet** | **73** | **N** | **P** | **P** | **P** | **N** | **P** | **P** | **N** | **N** | **N** | **N** |
| **WWTP D** | **Outlet** | **74** | **N** | **P** | **P** | **P** | **N** | **P** | **P** | **N** | **N** | **N** | **N** |
| **WWTP D** | **Outlet** | **75** | **N** | **P** | **P** | **P** | **N** | **P** | **P** | **N** | **N** | **N** | **N** |
| **WWTP D** | **Outlet** | **76** | **N** | **P** | **P** | **P** | **N** | **P** | **P** | **N** | **N** | **N** | **N** |
| **WWTP D** | **Outlet** | **77** | **N** | **P** | **P** | **P** | **N** | **P** | **P** | **N** | **N** | **N** | **N** |
| **WWTP D** | **Outlet** | **78** | **N** | **P** | **P** | **P** | **N** | **P** | **P** | **N** | **N** | **N** | **N** |
| **WWTP D** | **Outlet** | **79** | **N** | **P** | **P** | **P** | **N** | **P** | **P** | **N** | **N** | **N** | **N** |
| **WWTP D** | **Outlet** | **80** | **N** | **P** | **P** | **P** | **N** | **P** | **P** | **N** | **N** | **N** | **N** |
| **WWTP D** | **Outlet** | **81** | **N** | **P** | **P** | **P** | **N** | **P** | **P** | **N** | **N** | **N** | **N** |
| **WWTP D** | **Outlet** | **82** | **N** | **P** | **P** | **P** | **N** | **P** | **P** | **N** | **N** | **N** | **N** |
| **WWTP D** | **Outlet** | **83** | **N** | **P** | **P** | **P** | **N** | **P** | **P** | **N** | **N** | **N** | **N** |
| **WWTP D** | **Outlet** | **84** | **N** | **P** | **P** | **P** | **N** | **P** | **P** | **N** | **N** | **N** | **N** |
| **WWTP D** | **Outlet** | **85** | **N** | **P** | **P** | **P** | **N** | **P** | **P** | **N** | **N** | **N** | **N** |
| **WWTP D** | **Outlet** | **86** | **N** | **P** | **P** | **P** | **N** | **P** | **P** | **N** | **N** | **N** | **N** |
| **WWTP D** | **Outlet** | **87** | **N** | **P** | **P** | **P** | **N** | **P** | **P** | **N** | **N** | **N** | **N** |
| **WWTP D** | **Outlet** | **88** | **N** | **P** | **P** | **P** | **N** | **P** | **P** | **N** | **N** | **N** | **N** |
| **WWTP D** | **Outlet** | **89** | **N** | **P** | **P** | **P** | **N** | **P** | **P** | **N** | **N** | **N** | **N** |
| **WWTP D** | **Outlet** | **90** | **N** | **P** | **P** | **P** | **N** | **P** | **P** | **N** | **N** | **N** | **N** |
| **WWTP D** | **Outlet** | **91** | **N** | **P** | **P** | **P** | **N** | **P** | **P** | **N** | **N** | **N** | **N** |
| **WWTP D** | **Outlet** | **92** | **N** | **P** | **P** | **P** | **N** | **P** | **P** | **N** | **N** | **N** | **N** |
| **WWTP D** | **Outlet** | **93** | **N** | **P** | **P** | **P** | **N** | **P** | **P** | **N** | **N** | **N** | **N** |


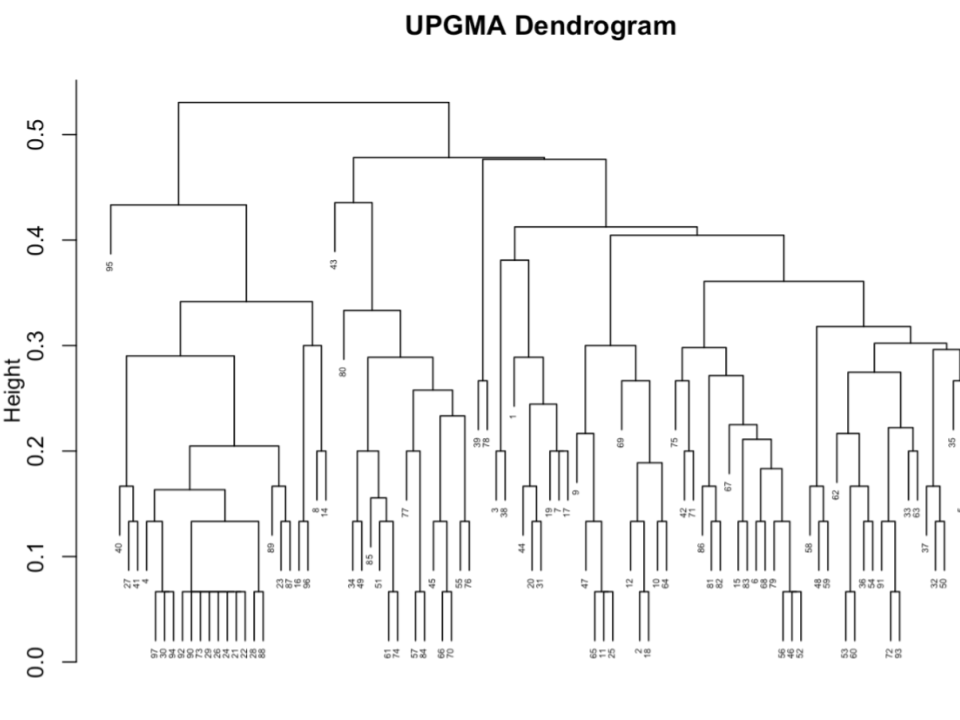


**Figure S1: Dendrogram Visualization of Antibiotic Resistance Profiles of E. coli Isolates from the Five WWTPs**


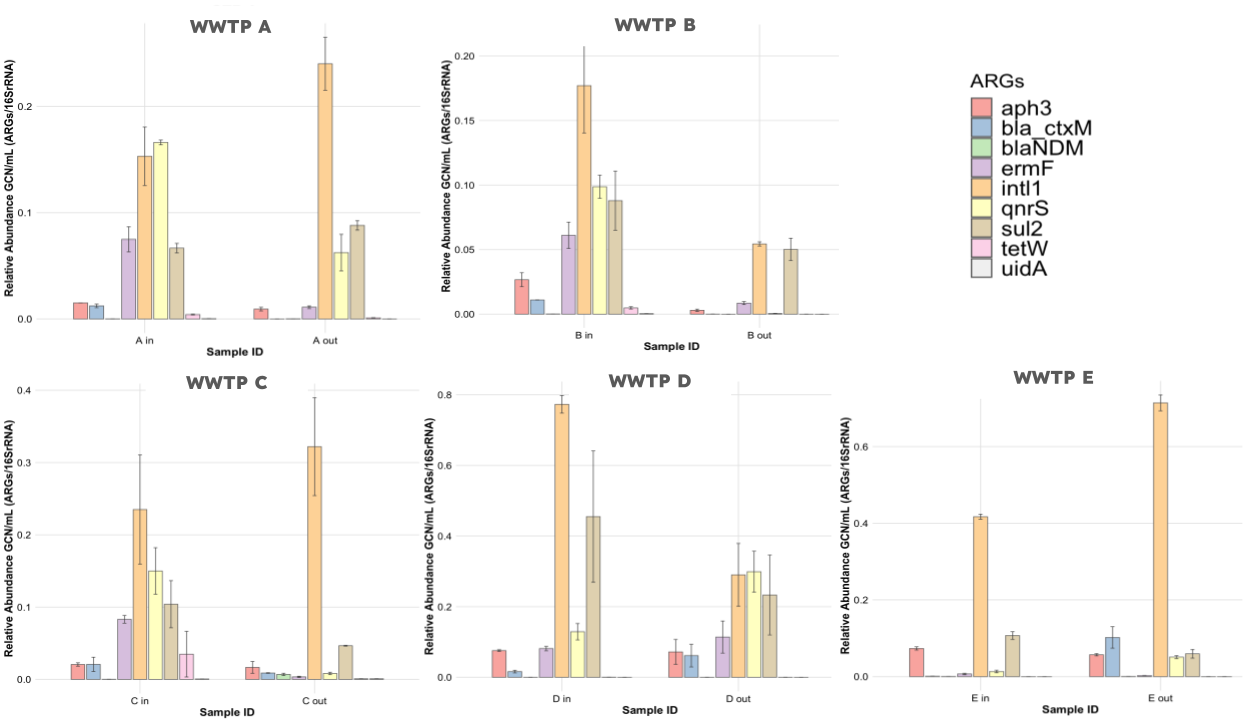


**Fig S2: Relative Abundance of ARGs in Various WWTPs**
